# Supplementary material
Source: PubMed Central journal article supplement (PMC3899897)

1uf2\_upper/180-299 QQP<sup>1</sup>FVAE<sup>2</sup>RRRIL<sup>3</sup>FGIRS<sup>4</sup>NAAIP<sup>5</sup>AGAYQ<sup>6</sup>F<sup>7</sup>  
 1bvp\_upper/147-251 QAVTAVVCGPDMIQVSLN-----AGARGDV  
 VVP-<sup>1</sup>AWASV<sup>2</sup>L<sup>3</sup>SVTG<sup>4</sup>AYVYFT<sup>5</sup>NSFFG<sup>6</sup>TIIAG<sup>7</sup>  
 QQIF<sup>1</sup>QGRNDP<sup>2</sup>MMIYL<sup>3</sup>VWRR<sup>4</sup>IENFAM<sup>5</sup>-----  
 VTAT<sup>1</sup>A<sup>2</sup>TAA<sup>3</sup>----DA<sup>4</sup>ATTFT<sup>5</sup>VPTDAN<sup>6</sup>NLPVQ<sup>7</sup>  
 ----AQ<sup>1</sup>GNSQQ<sup>2</sup>TQAGV<sup>3</sup>TVSVG<sup>4</sup>-----G  
 ---T<sup>1</sup>DSRLS<sup>2</sup>F<sup>3</sup>SLGG<sup>4</sup>GNINL<sup>5</sup>ELGVA<sup>6</sup>K<sup>7</sup>TGFCV<sup>8</sup>  
 VDMRAGRI<sup>1</sup>I<sup>2</sup>AWDGQAA<sup>3</sup>L<sup>4</sup>HVHN<sup>5</sup>PTQQ-NAMV<sup>6</sup>  
 AIEG<sup>1</sup>E<sup>2</sup>FTI  
 QIQV<sup>1</sup>VFYI<sup>2</sup>

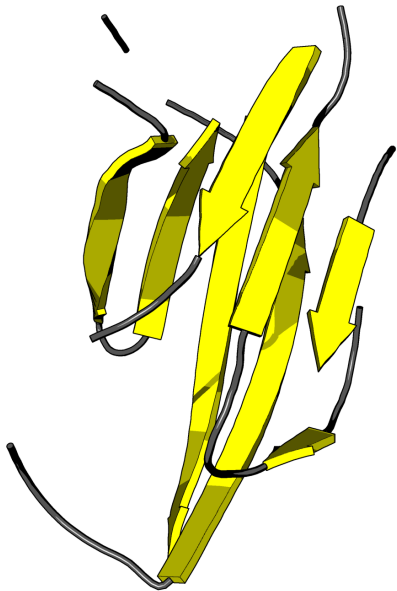

Supplement: NIHMS144804-supplement-03.pdf [file NIHMS144804-supplement-03.pdf]
