# Supplementary material
Source: PubMed Central journal article supplement (PMC3899897)

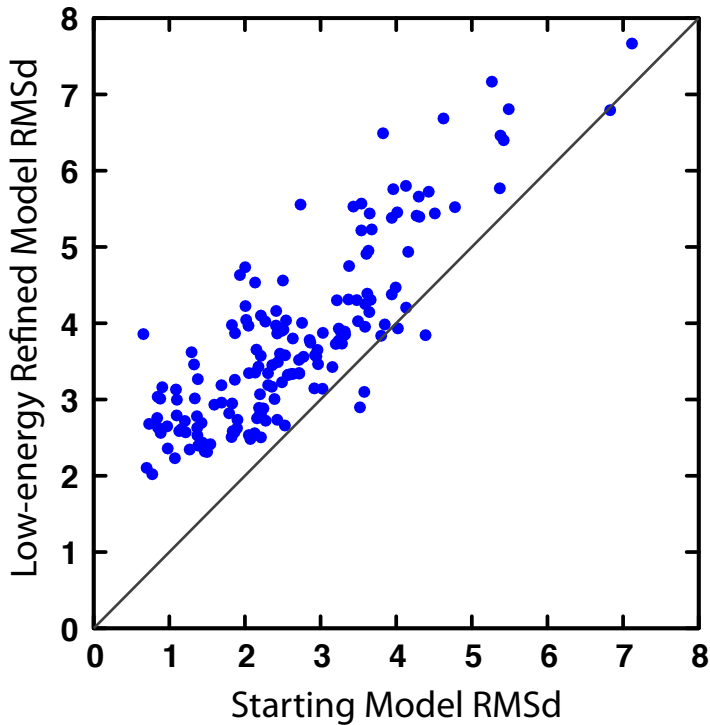

Supplement: NIHMS144804-supplement-02.pdf [file NIHMS144804-supplement-02.pdf]

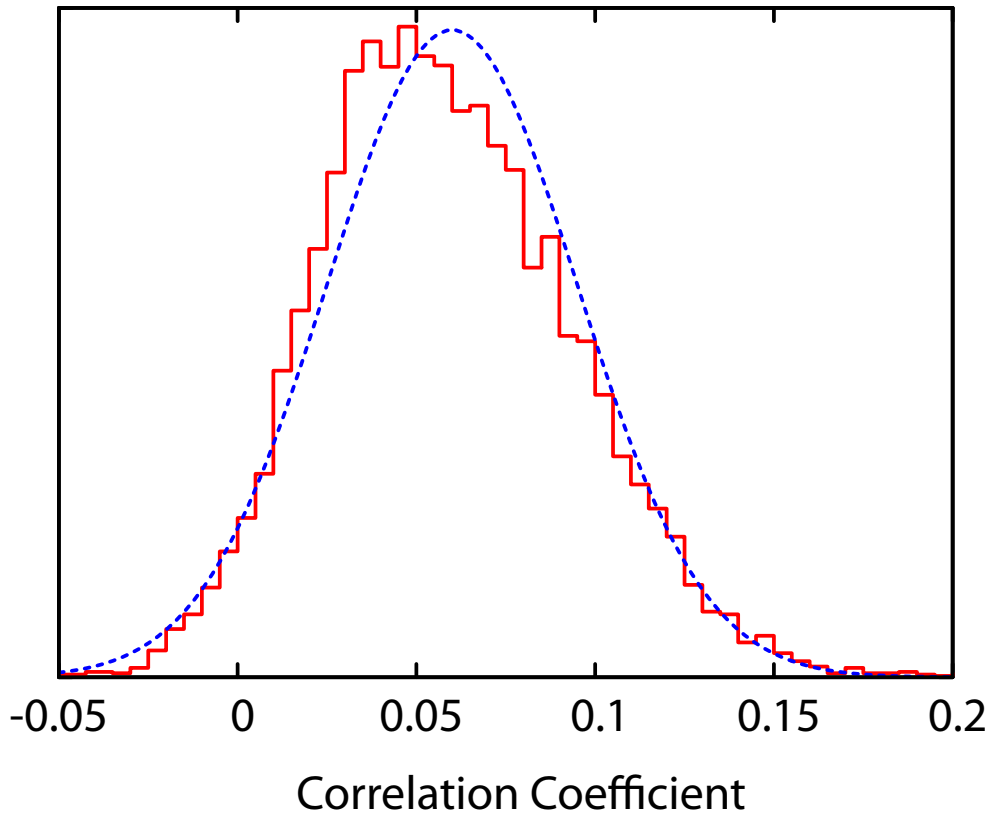

Supplement: NIHMS144804-supplement-04.pdf [file NIHMS144804-supplement-04.pdf]
